# Supplementary material for: The path to universal health coverage in five African and Asian countries: examining the association between insurance status and health-care use
Source: PubMed Central journal article supplement (PMC10716621; doi:10.1016/s2214-109x(23)00510-7), 2023-12-11
Supplement: mmc2.pdf [file mmc2.pdf]

# THE LANCET

## Global Health

### Supplementary appendix 2

This appendix formed part of the original submission and has been peer reviewed. We post it as supplied by the authors.

Supplement to: Odipo E, Jarhyan P, Nzinga J, et al. The path to universal health coverage in five African and Asian countries: examining the association between insurance status and health-care use. *Lancet Glob Health* 2023; published online Dec 11. [https://doi.org/10.1016/S2214-109X\(23\)00510-7](https://doi.org/10.1016/S2214-109X(23)00510-7).

**Supplementary Appendix 2 to: *Path to Universal Health Coverage in Africa and Asia: Examining the Relationship Between Insurance Status and Healthcare Utilization***

**Contents**

|                                                                                                                                                                                                            |           |
|------------------------------------------------------------------------------------------------------------------------------------------------------------------------------------------------------------|-----------|
| <b>Appendix 2: Supplementary Methodology and Results.....</b>                                                                                                                                              | <b>2</b>  |
| <b>Appendix 2 table 1: Survey questions on healthcare utilization outcomes and insurance.....</b>                                                                                                          | <b>2</b>  |
| <b>Appendix 2 figure 1: Anderson health utilization conceptual framework .....</b>                                                                                                                         | <b>3</b>  |
| <b>Appendix 2 table 2: Descriptive characteristics by country .....</b>                                                                                                                                    | <b>4</b>  |
| <b>Appendix 2 table 3: Healthcare utilization by health insurance type and socio-demographic characteristics .....</b>                                                                                     | <b>5</b>  |
| <b>Appendix 2 figure 2: Source of care facility type by insurance coverage.....</b>                                                                                                                        | <b>6</b>  |
| <b>Appendix 2 figure 3: Main reason for choice of usual source of care per country.....</b>                                                                                                                | <b>7</b>  |
| <b>Appendix 2 figure 4: Estimated associations between type of health insurance and health care visits by countries: Odds ratio (OR) and adjusted odds ratio (aOR).....</b>                                | <b>8</b>  |
| <b>Appendix 2 figure 5: Estimated associations between type of health insurance and unmet need by countries: Odds ratio (OR) and adjusted odds ratio (aOR) .....</b>                                       | <b>9</b>  |
| <b>Appendix 2 figure 6: Estimated associations between type of health insurance and mental care by countries: Odds ratio (OR) and adjusted odds ratio (aOR) .....</b>                                      | <b>10</b> |
| <b>Appendix 2 figure 7: Estimated associations between type of health insurance and cancer screening by countries: Odds ratio (OR) and adjusted odds ratio (aOR) .....</b>                                 | <b>11</b> |
| <b>Appendix 2 figure 8: Estimated associations between type of health insurance and cardiovascular examination by countries: Odds ratio (OR) and adjusted odds ratio (aOR)....</b>                         | <b>12</b> |
| <b>Appendix 2 figure 9: Estimated associations between type of health insurance and eye or teeth examination by countries: Odds ratio (OR) and adjusted odds ratio (aOR).....</b>                          | <b>13</b> |
| <b>Appendix 2 figure 10: Estimated associations between type of health insurance and confidence in ability to receive and afford care by countries: Odds ratio (OR) and adjusted odds ratio (aOR).....</b> | <b>14</b> |

## Appendix 2: Supplementary Methodology and Results

**Appendix 2 table 1: Survey questions on healthcare utilization outcomes and insurance**

| <b>Outcome</b>                                             | <b>Question</b>                                                                                                                                                                                                                                                               | <b>Response</b>                                                                                                                                                   |
|------------------------------------------------------------|-------------------------------------------------------------------------------------------------------------------------------------------------------------------------------------------------------------------------------------------------------------------------------|-------------------------------------------------------------------------------------------------------------------------------------------------------------------|
| <b>Insurance status</b>                                    | Do you have health insurance?                                                                                                                                                                                                                                                 | Yes/No                                                                                                                                                            |
| <b>Insurance type</b>                                      | What type of health insurance do you have?                                                                                                                                                                                                                                    | Public/Private                                                                                                                                                    |
| <b>Number of visits to a facility in the past year</b>     | How many healthcare visits in total have you made in the past 12 months?                                                                                                                                                                                                      | Numerical                                                                                                                                                         |
|                                                            | Could you please tell me if the total number of healthcare visits you have made in the past 12 months is...?                                                                                                                                                                  | <ol style="list-style-type: none"> <li>1. 0</li> <li>2. 1-4</li> <li>3. 5-9</li> <li>4. 10 or more</li> </ol>                                                     |
| <b>Unmet need in the past year</b>                         | In the last twelve months, was there a time when you had a health problem and needed medical attention, but you did not get healthcare from a provider?                                                                                                                       | Yes/No                                                                                                                                                            |
| <b>Received mental care in the past year</b>               | Can you please tell me if you have received any of the following health services in the past 12 months from any healthcare provider?<br>Received care for depression, anxiety, or another mental health condition. This may include feeling sad or worried a lot of the time. | Yes/No                                                                                                                                                            |
| <b>Received mammogram in the past year</b>                 | Can you please tell me if you have received any of the following health services in the past 12 months from any healthcare provider?<br>Received a mammogram? (Respondents who identify as female ages 50 and older)                                                          | Yes/No                                                                                                                                                            |
| <b>Received cervical cancer screening in the past year</b> | Can you please tell me if you have received any of the following health services in the past 12 months from any healthcare provider?<br>Received cervical cancer screening, like a pap test or visual inspection? (Respondents who identify as female over age 18)            | Yes/No                                                                                                                                                            |
| <b>Had a blood pressure test in the past year</b>          | Can you please tell me if you have received any of the following health services in the past 12 months from any healthcare provider?<br>Had your blood pressure tested?                                                                                                       | Yes/No                                                                                                                                                            |
| <b>Had a blood sugar test in the past year</b>             | Can you please tell me if you have received any of the following health services in the past 12 months from any healthcare provider?<br>Had a blood sugar test?                                                                                                               | Yes/No                                                                                                                                                            |
| <b>Had a blood cholesterol test in the past year</b>       | Can you please tell me if you have received any of the following health services in the past 12 months from any healthcare provider?<br>Had a blood cholesterol test?                                                                                                         | Yes/No                                                                                                                                                            |
| <b>Had eye or vision checked in the past year</b>          | Can you please tell me if you have received any of the following health services in the past 12 months from any healthcare provider?<br>Had your eyes or vision checked                                                                                                       | Yes/No                                                                                                                                                            |
| <b>Had your teeth checked in the past year</b>             | Can you please tell me if you have received any of the following health services in the past 12 months from any healthcare provider?<br>Had your teeth checked                                                                                                                | Yes/No                                                                                                                                                            |
| <b>Confidence in receiving care</b>                        | Now we would like to hear your thoughts on the healthcare system in your country as a whole, including public, private, and NGO healthcare facilities and providers. How confident are you...<br>That you would receive good quality healthcare if you became very sick?      | <ol style="list-style-type: none"> <li>1. Very confident</li> <li>2. Somewhat confident</li> <li>3. Not too confident</li> <li>4. Not at all confident</li> </ol> |
| <b>Confidence in ability to afford health care</b>         | Now we would like to hear your thoughts on the healthcare system in your country, including public, private, and NGO healthcare facilities and providers. How confident are you...<br>That you would be able to afford the healthcare you needed if you became very sick?     | <ol style="list-style-type: none"> <li>1. Very confident</li> <li>2. Somewhat confident</li> <li>3. Not too confident</li> <li>4. Not at all confident</li> </ol> |

**Appendix 2 figure 1: Anderson health utilization conceptual framework**

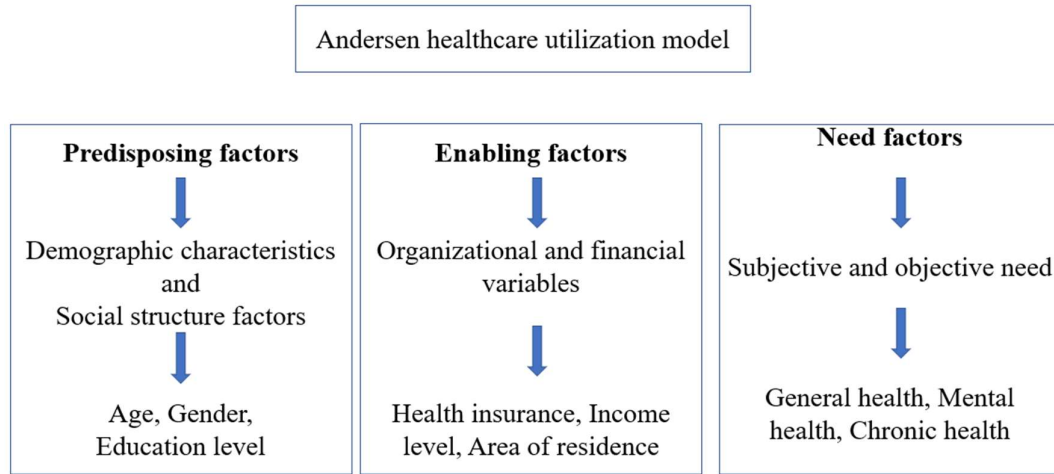

**Appendix 2 table 2: Descriptive characteristics by country**

| <b>CHARACTERISTICS</b>          | <b>ETHIOPIA</b><br>N = 2549 | <b>KENYA</b><br>N = 2013 | <b>SOUTH AFRICA</b><br>N = 1956 | <b>LAOS</b><br>N = 1759 | <b>INDIA</b><br>N = 1497 | <b>POOLED</b><br>N = 9774 |
|---------------------------------|-----------------------------|--------------------------|---------------------------------|-------------------------|--------------------------|---------------------------|
| <b>Enabling factors</b>         |                             |                          |                                 |                         |                          |                           |
| <b>Insurance</b>                |                             |                          |                                 |                         |                          |                           |
| Private+                        | 37 (1%)                     | 68 (3%)                  | 253 (13%)                       | 220 (13%)               | 110 (7%)                 | 689 (7%)                  |
| Public                          | 1,536 (60%)                 | 588 (29%)                | 0 (0%)                          | 1,539 (87%)             | 237 (16%)                | 3,901 (40%)               |
| Uninsured                       | 975 (38%)                   | 1,357 (67%)              | 1,702 (87%)                     | 0 (0%)                  | 1,150 (77%)              | 5,184 (53%)               |
| <b>Area of residence</b>        |                             |                          |                                 |                         |                          |                           |
| Rural                           | 1,794 (70%)                 | 1,313 (65%)              | 609 (31%)                       | 1,181 (67%)             | 753 (50%)                | 5,650 (58%)               |
| Urban                           | 755 (30%)                   | 700 (35%)                | 1,347 (69%)                     | 578 (33%)               | 744 (50%)                | 4,123 (42%)               |
| <b>Household income</b>         |                             |                          |                                 |                         |                          |                           |
| Low/Middle                      | 1,747 (69%)                 | 1,413 (70%)              | 1,451 (74%)                     | 883 (50%)               | 1,297 (87%)              | 6,791 (69%)               |
| Highest                         | 801 (31%)                   | 600 (30%)                | 505 (26%)                       | 876 (50%)               | 200 (13%)                | 2,983 (31%)               |
| <b>Predisposing factors</b>     |                             |                          |                                 |                         |                          |                           |
| <b>Age</b>                      |                             |                          |                                 |                         |                          |                           |
| 18-29                           | 1,102 (43%)                 | 819 (41%)                | 560 (29%)                       | 548 (31%)               | 544 (36%)                | 3,573 (37%)               |
| 30-39                           | 625 (25%)                   | 502 (25%)                | 521 (27%)                       | 358 (20%)               | 305 (20%)                | 2,311 (24%)               |
| 40-49                           | 396 (16%)                   | 359 (18%)                | 393 (20%)                       | 398 (23%)               | 322 (22%)                | 1,867 (19%)               |
| 50-59                           | 189 (7%)                    | 192 (10%)                | 208 (11%)                       | 298 (17%)               | 156 (10%)                | 1,041 (11%)               |
| 60 or older                     | 237 (9%)                    | 142 (7%)                 | 274 (14%)                       | 158 (9%)                | 171 (11%)                | 982 (10%)                 |
| <b>Gender</b>                   |                             |                          |                                 |                         |                          |                           |
| Male                            | 1,304 (51%)                 | 1,013 (50%)              | 944 (48%)                       | 878 (50%)               | 831 (56%)                | 4,969 (51%)               |
| Female                          | 1,245 (49%)                 | 1,000 (50%)              | 1,012 (52%)                     | 882 (50%)               | 666 (44%)                | 4,805 (49%)               |
| <b>Education</b>                |                             |                          |                                 |                         |                          |                           |
| None/Primary                    | 2,021 (79%)                 | 1,268 (63%)              | 1,091 (56%)                     | 933 (53%)               | 502 (34%)                | 5,815 (60%)               |
| Secondary                       | 312 (12%)                   | 520 (26%)                | 643 (33%)                       | 548 (31%)               | 416 (28%)                | 2,438 (25%)               |
| Post-secondary                  | 215 (8%)                    | 225 (11%)                | 222 (11%)                       | 279 (16%)               | 579 (39%)                | 1,520 (16%)               |
| <b>Need factors</b>             |                             |                          |                                 |                         |                          |                           |
| <b>General health</b>           |                             |                          |                                 |                         |                          |                           |
| Poor or fair                    | 766 (30%)                   | 373 (19%)                | 605 (31%)                       | 503 (29%)               | 611 (41%)                | 2,858 (29%)               |
| Good or higher                  | 1,782 (70%)                 | 1,640 (81%)              | 1,351 (69%)                     | 1,256 (71%)             | 886 (59%)                | 6,915 (71%)               |
| <b>Mental health</b>            |                             |                          |                                 |                         |                          |                           |
| Poor or fair                    | 548 (22%)                   | 159 (8%)                 | 383 (20%)                       | 409 (23%)               | 508 (34%)                | 2,007 (21%)               |
| Good or higher                  | 2,000 (78%)                 | 1,854 (92%)              | 1,573 (80%)                     | 1,350 (77%)             | 989 (66%)                | 7,767 (79%)               |
| <b>Chronic health condition</b> |                             |                          |                                 |                         |                          |                           |
| No                              | 2,207 (87%)                 | 1,680 (83%)              | 1,414 (72%)                     | 1,336 (76%)             | 1,288 (86%)              | 7,926 (81%)               |
| Yes                             | 341 (13%)                   | 333 (17%)                | 542 (28%)                       | 423 (24%)               | 209 (14%)                | 1,847 (19%)               |

**Appendix 2 table 3: Healthcare utilization by health insurance type and socio-demographic characteristics**

| Characteristics                 | Visits in the past 12 mo.<br>N = 6542 (67%) | Unmet need<br>N = 1319 (14%) | Mental healthcare<br>N = 638 (7%) | Cancer screening<br>N = 782 (16%) | Cardio. exam<br>N = 5201 (53%) | Eye or teeth exam<br>N = 2629 (27%) | Confident receive & afford care<br>N = 5356 (55%) |
|---------------------------------|---------------------------------------------|------------------------------|-----------------------------------|-----------------------------------|--------------------------------|-------------------------------------|---------------------------------------------------|
| <b>Enabling factors</b>         |                                             |                              |                                   |                                   |                                |                                     |                                                   |
| <b>Insurance</b>                |                                             |                              |                                   |                                   |                                |                                     |                                                   |
| Private+                        | 524 (76%)                                   | 92 (13%)                     | 63 (9%)                           | 64 (19%)                          | 484 (70%)                      | 321 (47%)                           | 444 (66%)                                         |
| Public                          | 2,520 (65%)                                 | 586 (15%)                    | 166 (4%)                          | 267 (15%)                         | 1,991 (51%)                    | 935 (24%)                           | 2,283 (59%)                                       |
| Uninsured                       | 3,498 (68%)                                 | 641 (12%)                    | 409 (8%)                          | 450 (17%)                         | 2,726 (53%)                    | 1,373 (27%)                         | 2,629 (51%)                                       |
| <b>Area of residence</b>        |                                             |                              |                                   |                                   |                                |                                     |                                                   |
| Rural                           | 3,768 (67%)                                 | 878 (16%)                    | 281 (5%)                          | 369 (13%)                         | 2,707 (48%)                    | 1,249 (22%)                         | 3,143 (56%)                                       |
| Urban                           | 2,775 (68%)                                 | 441 (11%)                    | 357 (9%)                          | 413 (21%)                         | 2,495 (61%)                    | 1,379 (34%)                         | 2,213 (54%)                                       |
| <b>Household income</b>         |                                             |                              |                                   |                                   |                                |                                     |                                                   |
| Low/Middle                      | 4,519 (67%)                                 | 984 (15%)                    | 481 (7%)                          | 582 (17%)                         | 3,453 (51%)                    | 1,693 (25%)                         | 3,561 (53%)                                       |
| Highest                         | 2,024 (68%)                                 | 336 (11%)                    | 157 (5%)                          | 199 (16%)                         | 1,748 (59%)                    | 935 (31%)                           | 1,795 (61%)                                       |
| <b>Predisposing factors</b>     |                                             |                              |                                   |                                   |                                |                                     |                                                   |
| <b>Age</b>                      |                                             |                              |                                   |                                   |                                |                                     |                                                   |
| 18-29                           | 2,215 (62%)                                 | 605 (17%)                    | 191 (5%)                          | 221 (12%)                         | 1,538 (43%)                    | 776 (22%)                           | 1,864 (53%)                                       |
| 30-39                           | 1,606 (70%)                                 | 251 (11%)                    | 155 (7%)                          | 212 (18%)                         | 1,220 (53%)                    | 608 (26%)                           | 1,231 (54%)                                       |
| 40-49                           | 1,277 (69%)                                 | 231 (12%)                    | 128 (7%)                          | 155 (17%)                         | 1,137 (61%)                    | 537 (29%)                           | 1,085 (58%)                                       |
| 50-59                           | 756 (73%)                                   | 120 (12%)                    | 71 (7%)                           | 89 (19%)                          | 660 (63%)                      | 348 (33%)                           | 616 (60%)                                         |
| 60 or older                     | 688 (70%)                                   | 112 (11%)                    | 93 (10%)                          | 106 (25%)                         | 647 (66%)                      | 360 (37%)                           | 560 (57%)                                         |
| <b>Gender</b>                   |                                             |                              |                                   |                                   |                                |                                     |                                                   |
| Male                            | 3,083 (62%)                                 | 592 (12%)                    | 290 (6%)                          |                                   | 2,421 (49%)                    | 1,366 (28%)                         | 2,750 (56%)                                       |
| Female                          | 3,459 (72%)                                 | 727 (15%)                    | 348 (7%)                          |                                   | 2,780 (58%)                    | 1,263 (26%)                         | 2,605 (55%)                                       |
| <b>Education</b>                |                                             |                              |                                   |                                   |                                |                                     |                                                   |
| None/Primary                    | 3,938 (68%)                                 | 864 (15%)                    | 390 (7%)                          | 527 (17%)                         | 3,011 (52%)                    | 1,437 (25%)                         | 3,070 (53%)                                       |
| Secondary                       | 1,626 (67%)                                 | 294 (12%)                    | 153 (6%)                          | 173 (16%)                         | 1,318 (54%)                    | 697 (29%)                           | 1,383 (57%)                                       |
| Post-secondary                  | 979 (65%)                                   | 161 (11%)                    | 95 (6%)                           | 81 (12%)                          | 873 (57%)                      | 494 (33%)                           | 902 (60%)                                         |
| <b>Need factors</b>             |                                             |                              |                                   |                                   |                                |                                     |                                                   |
| <b>General health</b>           |                                             |                              |                                   |                                   |                                |                                     |                                                   |
| Poor or fair                    | 2,119 (74%)                                 | 452 (16%)                    | 276 (10%)                         | 336 (23%)                         | 1,696 (59%)                    | 827 (29%)                           | 1,535 (54%)                                       |
| Good or higher                  | 4,423 (64%)                                 | 868 (13%)                    | 362 (5%)                          | 445 (13%)                         | 3,505 (51%)                    | 1,801 (26%)                         | 3,820 (56%)                                       |
| <b>Mental health</b>            |                                             |                              |                                   |                                   |                                |                                     |                                                   |
| Poor or fair                    | 1,355 (68%)                                 | 270 (13%)                    | 230 (12%)                         | 205 (20%)                         | 1,090 (54%)                    | 563 (28%)                           | 1,098 (56%)                                       |
| Good or higher                  | 5,188 (67%)                                 | 1,049 (14%)                  | 408 (5%)                          | 577 (16%)                         | 4,111 (53%)                    | 2,065 (27%)                         | 4,258 (55%)                                       |
| <b>Chronic health condition</b> |                                             |                              |                                   |                                   |                                |                                     |                                                   |
| No                              | 4,920 (62%)                                 | 960 (12%)                    | 430 (5%)                          | 506 (14%)                         | 3,759 (47%)                    | 1,978 (25%)                         | 4,398 (56%)                                       |
| Yes                             | 1,623 (88%)                                 | 360 (19%)                    | 208 (11%)                         | 275 (27%)                         | 1,442 (78%)                    | 651 (35%)                           | 958 (52%)                                         |

Outcomes included visits in the past 12 months, unmet need, mental healthcare, cancer screening, cardiovascular examination, eye or teeth examination and the ability to receive and afford care. Cardiovascular examination is a combination of blood pressure, blood sugar and cholesterol checks. The summary provided for healthcare utilization indicates users of healthcare facility in past 12 months, confidence in ability to receive and afford care, those who agree to having an unmet need, receiving mental healthcare, cancer screening, cardiovascular and eye or teeth examination.

**Appendix 2 figure 2: Source of care facility type by insurance coverage**

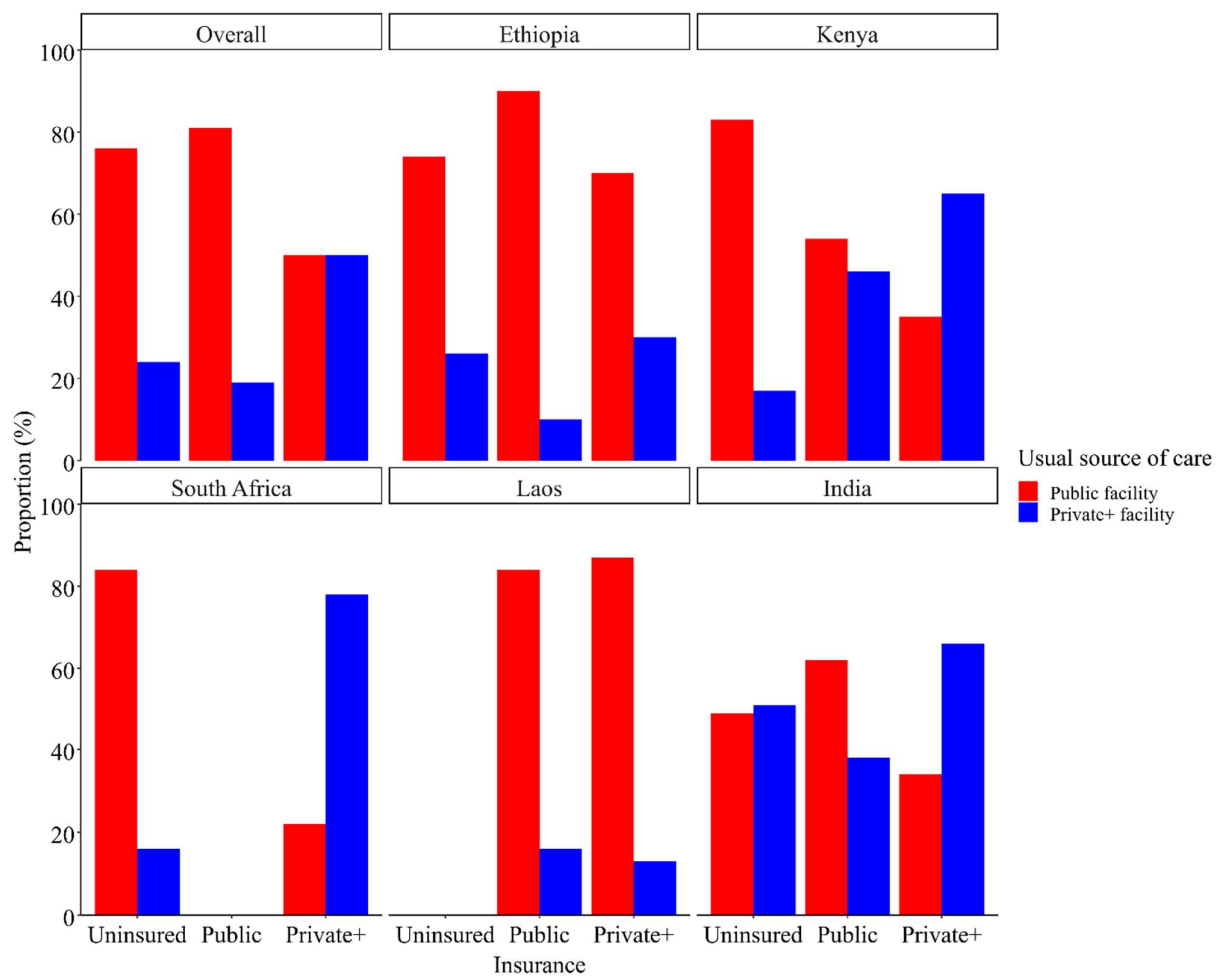

**Appendix 2 figure 3: Main reason for choice of usual source of care per country**

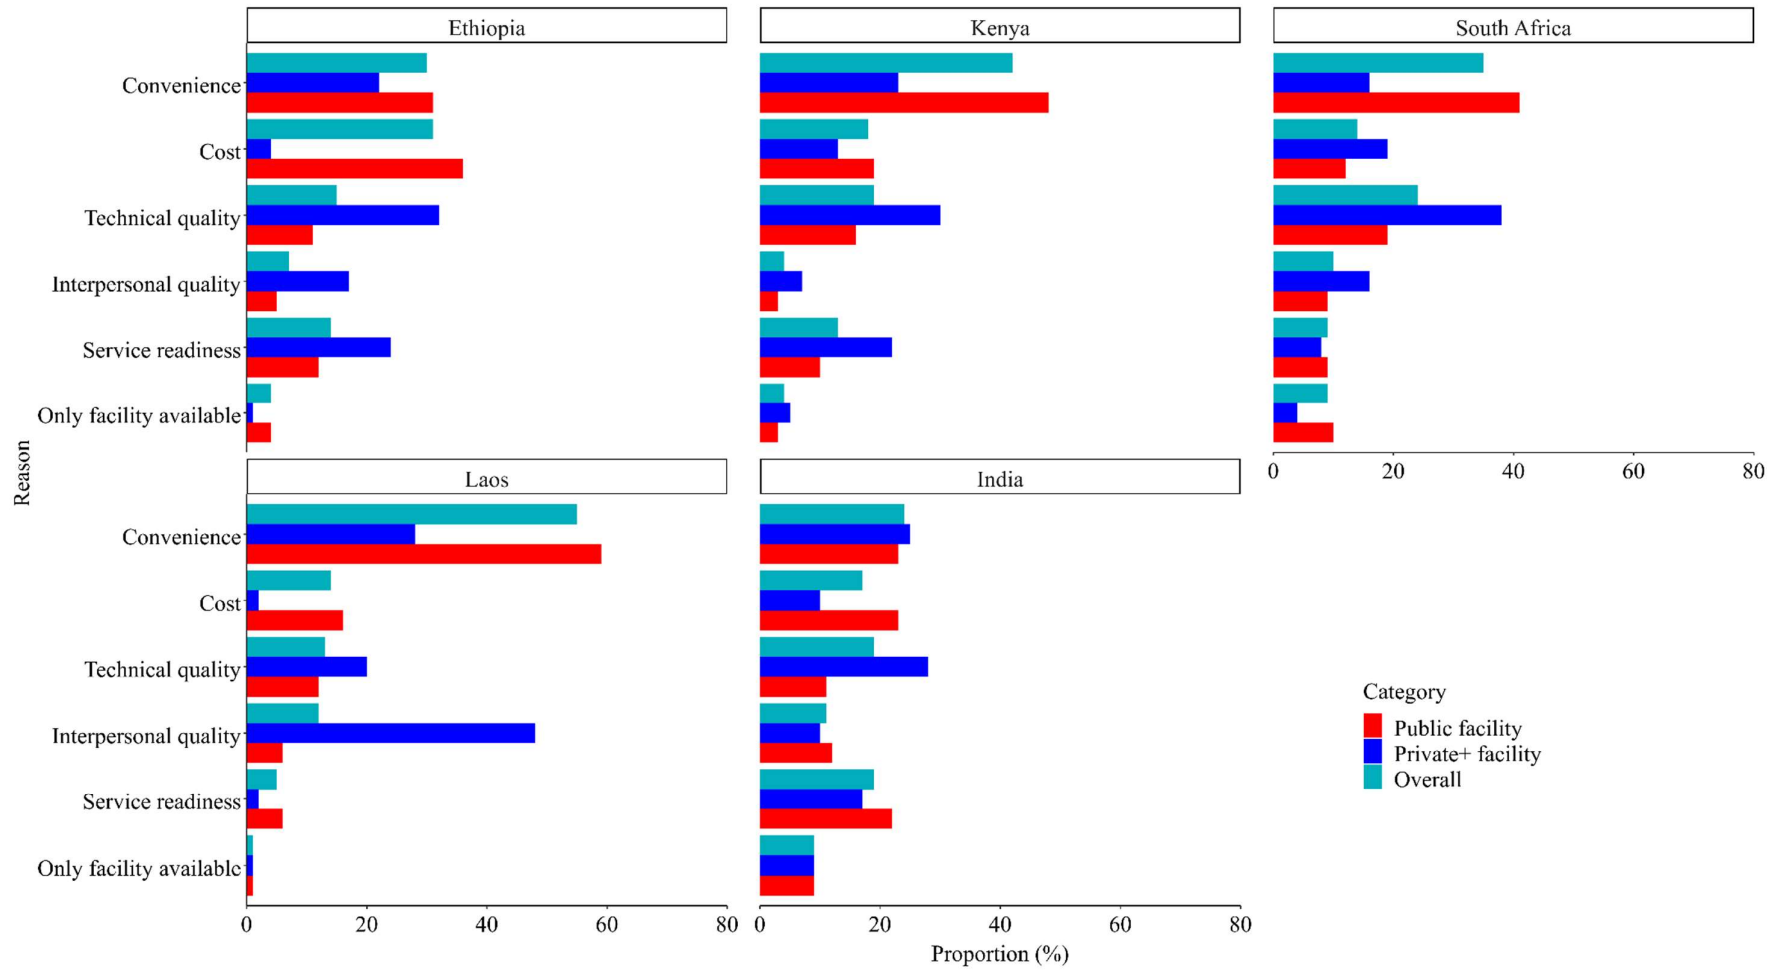



**Appendix 2 figure 4: Estimated associations between type of health insurance and health care visits by countries: Odds ratio (OR) and adjusted odds ratio (aOR)**

| FACTORS                         | ETHIOPIA          |                   | KENYA             |                   | SOUTH AFRICA      |                   | LAOS              |                   | INDIA             |                   | Pooled AOR |
|---------------------------------|-------------------|-------------------|-------------------|-------------------|-------------------|-------------------|-------------------|-------------------|-------------------|-------------------|------------|
|                                 | OR (95%CI)        | aOR(95%CI)        | OR (95%CI)        | aOR(95%CI)        | OR (95%CI)        | aOR(95%CI)        | OR (95%CI)        | aOR(95%CI)        | OR (95%CI)        | aOR(95%CI)        |            |
| <b>Enabling factors</b>         |                   |                   |                   |                   |                   |                   |                   |                   |                   |                   |            |
| <b>Insurance</b>                |                   |                   |                   |                   |                   |                   |                   |                   |                   |                   |            |
| Private+                        |                   |                   |                   |                   |                   |                   |                   |                   |                   |                   | ■          |
| Public                          | 0.53 (0.15, 1.81) | 0.64 (0.22, 1.84) | 0.38 (0.17, 0.84) | 0.38 (0.17, 0.85) |                   |                   | 0.65 (0.38, 1.11) | 0.74 (0.43, 1.29) | 1.34 (0.61, 2.93) | 1.68 (0.77, 3.67) | ■          |
| Uninsured                       | 0.53 (0.16, 1.81) | 0.52 (0.19, 1.45) | 0.58 (0.27, 1.26) | 0.41 (0.19, 0.91) | 0.71 (0.45, 1.13) | 0.69 (0.41, 1.16) |                   |                   | 0.51 (0.27, 0.98) | 0.55 (0.30, 1.01) | ■          |
| <b>Area of residence</b>        |                   |                   |                   |                   |                   |                   |                   |                   |                   |                   |            |
| Rural                           |                   |                   |                   |                   |                   |                   |                   |                   |                   |                   |            |
| Urban                           | 1.48 (1.12, 1.95) |                   | 0.42 (0.23, 0.78) | 0.58 (0.33, 1.05) | 1.1 (0.77, 1.55)  |                   | 1.11 (0.81, 1.50) |                   | 0.94 (0.67, 1.31) |                   |            |
| <b>Household income</b>         |                   |                   |                   |                   |                   |                   |                   |                   |                   |                   |            |
| Low/Middle                      |                   |                   |                   |                   |                   |                   |                   |                   |                   |                   |            |
| Highest                         | 1.53 (0.96, 2.44) | 1.63 (1.00, 2.68) | 0.55 (0.37, 0.82) |                   | 1 (0.72, 1.38)    |                   | 1.22 (0.86, 1.73) | 1.24 (0.85, 1.79) | 0.77 (0.41, 1.43) | 0.68 (0.42, 1.10) | ■          |
| <b>Predisposing factors</b>     |                   |                   |                   |                   |                   |                   |                   |                   |                   |                   |            |
| <b>Age</b>                      |                   |                   |                   |                   |                   |                   |                   |                   |                   |                   |            |
| 18-29                           |                   |                   |                   |                   |                   |                   |                   |                   |                   |                   |            |
| 30-39                           | 2 (1.20, 3.35)    | 1.71 (1.06, 2.77) | 0.97 (0.66, 1.41) | 0.75 (0.52, 1.08) | 1.33 (0.94, 1.89) | 1.16 (0.81, 1.66) | 1.28 (0.78, 2.10) | 1.27 (0.75, 2.14) | 1.03 (0.76, 1.41) | 0.8 (0.58, 1.11)  | ■          |
| 40-49                           | 1.73 (1.10, 2.71) | 1.47 (0.91, 2.38) | 0.97 (0.60, 1.56) | 0.8 (0.48, 1.34)  | 1.31 (0.84, 2.03) | 0.95 (0.60, 1.50) | 1.19 (0.75, 1.88) | 1.09 (0.65, 1.82) | 1.25 (0.82, 1.91) | 0.92 (0.58, 1.46) | ■          |
| 50-59                           | 2.16 (1.21, 3.86) | 1.68 (0.90, 3.12) | 2.47 (1.27, 4.79) | 1.69 (0.90, 3.19) | 1.9 (1.06, 3.41)  | 0.98 (0.51, 1.86) | 0.83 (0.49, 1.43) | 0.71 (0.40, 1.27) | 2.05 (1.04, 4.06) | 1.53 (0.78, 2.99) | ■          |
| 60 or older                     | 1.89 (0.71, 5.00) | 1.38 (0.61, 3.13) | 1.61 (0.69, 3.76) | 0.78 (0.37, 1.67) | 1.86 (0.92, 3.75) | 0.71 (0.32, 1.56) | 2.01 (0.93, 4.33) | 1.57 (0.67, 3.71) | 0.56 (0.24, 1.32) | 0.41 (0.19, 0.86) | ■          |
| <b>Gender</b>                   |                   |                   |                   |                   |                   |                   |                   |                   |                   |                   |            |
| Male                            |                   |                   |                   |                   |                   |                   |                   |                   |                   |                   |            |
| Female                          | 1.26 (0.92, 1.74) | 1.32 (0.92, 1.90) | 2.54 (1.87, 3.47) | 2.2 (1.61, 3.00)  | 2.19 (1.58, 3.04) | 1.88 (1.36, 2.60) | 1.49 (1.05, 2.13) | 1.7 (1.19, 2.44)  | 0.99 (0.72, 1.37) |                   | ■          |
| <b>Education</b>                |                   |                   |                   |                   |                   |                   |                   |                   |                   |                   |            |
| None/Primary                    |                   |                   |                   |                   |                   |                   |                   |                   |                   |                   |            |
| Secondary                       | 1.3 (0.95, 1.76)  | 1.5 (1.18, 1.92)  | 0.41 (0.28, 0.60) | 0.54 (0.34, 0.85) | 1 (0.73, 1.39)    |                   | 1.07 (0.75, 1.52) | 1.3 (0.86, 1.94)  | 1.19 (0.75, 1.87) |                   | ■          |
| Post-secondary                  | 1.55 (1.17, 2.06) | 1.52 (1.06, 2.18) | 0.57 (0.37, 0.89) | 0.87 (0.54, 1.40) | 0.78 (0.55, 1.09) |                   | 1.36 (0.95, 1.93) | 1.5 (1.0, 2.26)   | 1.12 (0.75, 1.67) |                   | ■          |
| <b>Need factors</b>             |                   |                   |                   |                   |                   |                   |                   |                   |                   |                   |            |
| <b>General health</b>           |                   |                   |                   |                   |                   |                   |                   |                   |                   |                   |            |
| Poor or fair                    |                   |                   |                   |                   |                   |                   |                   |                   |                   |                   |            |
| Good or higher                  | 0.43 (0.25, 0.72) | 0.48 (0.25, 0.92) | 0.44 (0.26, 0.74) |                   | 0.45 (0.30, 0.69) | 0.63 (0.40, 1.01) | 0.8 (0.54, 1.19)  | 0.75 (0.46, 1.23) | 0.67 (0.48, 0.94) | 0.72 (0.49, 1.07) | ■          |
| <b>Mental health</b>            |                   |                   |                   |                   |                   |                   |                   |                   |                   |                   |            |
| Poor or fair                    |                   |                   |                   |                   |                   |                   |                   |                   |                   |                   |            |
| Good or higher                  | 0.75 (0.49, 1.17) | 1.2 (0.71, 2.01)  | 0.44 (0.22, 0.87) | 0.66 (0.33, 1.30) | 0.62 (0.39, 0.99) |                   | 1.17 (0.79, 1.73) | 1.67 (1.04, 2.66) | 0.93 (0.66, 1.32) | 1.29 (0.86, 1.93) | ■          |
| <b>Chronic health condition</b> |                   |                   |                   |                   |                   |                   |                   |                   |                   |                   |            |
| No                              |                   |                   |                   |                   |                   |                   |                   |                   |                   |                   |            |
| Yes                             | 7.28 (4.54, 11.7) | 5.63 (3.33, 9.54) | 8.94 (4.49, 17.8) | 7.33 (3.74, 14.4) | 5.48 (3.16, 9.50) | 4.6 (2.58, 8.21)  | 2.28 (1.48, 3.50) | 2.46 (1.47, 4.12) | 3.78 (1.88, 7.60) | 3.66 (1.83, 7.32) | ■          |

**Appendix 2 figure 5: Estimated associations between type of health insurance and unmet need by countries: Odds ratio (OR) and adjusted odds ratio (aOR)**

| Factors                         | ETHIOPIA          |                   | KENYA             |                   | SOUTH AFRICA      |                   | LAOS              |                   | INDIA             |                   |   |
|---------------------------------|-------------------|-------------------|-------------------|-------------------|-------------------|-------------------|-------------------|-------------------|-------------------|-------------------|---|
|                                 | OR (95%CI)        | aOR(95%CI)        | OR (95%CI)        | aOR(95%CI)        | OR (95%CI)        | aOR(95%CI)        | OR (95%CI)        | aOR(95%CI)        | OR (95%CI)        | aOR(95%CI)        |   |
| <b>Enabling factors</b>         |                   |                   |                   |                   |                   |                   |                   |                   |                   |                   |   |
| <b>Insurance</b>                |                   |                   |                   |                   |                   |                   |                   |                   |                   |                   |   |
| Private+                        |                   |                   |                   |                   |                   |                   |                   |                   |                   |                   | ■ |
| Public                          | 1.02 (0.34, 3.03) | 0.59 (0.18, 1.97) | 0.97 (0.45, 2.09) | 0.69 (0.31, 1.55) |                   |                   | 0.62 (0.37, 1.03) | 0.63 (0.37, 1.09) | 4.68 (1.31, 16.8) | 4.36 (1.24, 15.3) | ■ |
| Uninsured                       | 0.89 (0.35, 2.28) | 0.58 (0.18, 1.85) | 1.1 (0.54, 2.26)  | 0.51 (0.25, 1.05) | 1.61 (0.70, 3.69) | 1.3 (0.60, 2.80)  |                   |                   | 2.33 (0.85, 6.39) | 2.29 (0.77, 6.81) | ■ |
| <b>Area of residence</b>        |                   |                   |                   |                   |                   |                   |                   |                   |                   |                   |   |
| Rural                           |                   |                   |                   |                   |                   |                   |                   |                   |                   |                   | ■ |
| Urban                           | 0.47 (0.27, 0.79) | 0.63 (0.40, 0.99) | 0.7 (0.39, 1.24)  |                   | 0.72 (0.45, 1.15) | 0.73 (0.45, 1.20) | 1.24 (0.84, 1.84) |                   | 0.65 (0.35, 1.24) |                   | ■ |
| <b>Household income</b>         |                   |                   |                   |                   |                   |                   |                   |                   |                   |                   |   |
| Low/Middle                      |                   |                   |                   |                   |                   |                   |                   |                   |                   |                   | ■ |
| Highest                         | 0.52 (0.27, 0.99) | 0.61 (0.34, 1.09) | 0.44 (0.28, 0.69) | 0.55 (0.36, 0.84) | 0.68 (0.42, 1.13) | 0.71 (0.44, 1.14) | 0.92 (0.60, 1.42) |                   | 0.75 (0.28, 2.02) |                   | ■ |
| <b>Predisposing factors</b>     |                   |                   |                   |                   |                   |                   |                   |                   |                   |                   |   |
| <b>Age</b>                      |                   |                   |                   |                   |                   |                   |                   |                   |                   |                   |   |
| 18-29                           |                   |                   |                   |                   |                   |                   |                   |                   |                   |                   | ■ |
| 30-39                           | 0.39 (0.18, 0.86) | 0.34 (0.17, 0.69) | 0.66 (0.36, 1.21) | 0.47 (0.23, 0.95) | 0.97 (0.60, 1.58) | 0.89 (0.54, 1.45) | 0.36 (0.21, 0.62) | 0.35 (0.20, 0.62) | 1.61 (0.87, 2.97) | 1.31 (0.66, 2.59) | ■ |
| 40-49                           | 0.55 (0.20, 1.54) | 0.34 (0.13, 0.90) | 0.82 (0.36, 1.88) | 0.61 (0.28, 1.32) | 0.53 (0.26, 1.07) | 0.43 (0.20, 0.92) | 0.75 (0.43, 1.28) | 0.75 (0.43, 1.32) | 0.92 (0.43, 1.97) | 0.74 (0.32, 1.70) | ■ |
| 50-59                           | 0.28 (0.11, 0.72) | 0.15 (0.05, 0.49) | 1.1 (0.49, 2.50)  | 0.73 (0.30, 1.81) | 0.86 (0.41, 1.83) | 0.6 (0.27, 1.31)  | 0.37 (0.18, 0.74) | 0.4 (0.19, 0.82)  | 0.86 (0.21, 3.55) | 0.76 (0.16, 3.56) | ■ |
| 60 or older                     | 0.57 (0.10, 3.43) | 0.23 (0.05, 0.97) | 1.35 (0.49, 3.74) | 0.57 (0.24, 1.38) | 0.41 (0.15, 1.16) | 0.26 (0.10, 0.72) | 0.44 (0.14, 1.37) | 0.45 (0.14, 1.49) | 1.37 (0.26, 7.19) | 1.09 (0.29, 4.14) | ■ |
| <b>Gender</b>                   |                   |                   |                   |                   |                   |                   |                   |                   |                   |                   |   |
| Male                            |                   |                   |                   |                   |                   |                   |                   |                   |                   |                   | ■ |
| Female                          | 1.19 (0.42, 3.36) |                   | 1.28 (0.75, 2.19) |                   | 1.11 (0.72, 1.71) |                   | 1.75 (1.16, 2.63) | 1.81 (1.21, 2.69) | 1.05 (0.55, 2.00) |                   | ■ |
| <b>Education</b>                |                   |                   |                   |                   |                   |                   |                   |                   |                   |                   |   |
| None/Primary                    |                   |                   |                   |                   |                   |                   |                   |                   |                   |                   | ■ |
| Secondary                       | 0.49 (0.25, 0.96) | 0.49 (0.25, 0.94) | 0.58 (0.38, 0.87) | 0.61 (0.38, 0.99) | 1.22 (0.78, 1.91) | 1.38 (0.85, 2.25) | 1.16 (0.73, 1.86) | 1.05 (0.65, 1.71) | 0.76 (0.31, 1.88) |                   | ■ |
| Post-secondary                  | 0.43 (0.25, 0.73) | 0.82 (0.51, 1.30) | 0.43 (0.28, 0.67) | 0.48 (0.29, 0.80) | 1.17 (0.71, 1.92) | 1.59 (0.87, 2.88) | 1.53 (0.96, 2.45) | 1.46 (0.89, 2.39) | 1.03 (0.45, 2.32) |                   | ■ |
| <b>Need factors</b>             |                   |                   |                   |                   |                   |                   |                   |                   |                   |                   |   |
| <b>General health</b>           |                   |                   |                   |                   |                   |                   |                   |                   |                   |                   |   |
| Poor or fair                    |                   |                   |                   |                   |                   |                   |                   |                   |                   |                   | ■ |
| Good or higher                  | 0.51 (0.17, 1.58) | 0.64 (0.25, 1.66) | 0.46 (0.32, 0.66) | 0.53 (0.39, 0.73) | 0.72 (0.45, 1.15) | 0.66 (0.38, 1.13) | 1.13 (0.68, 1.88) |                   | 0.59 (0.31, 1.16) | 0.65 (0.29, 1.47) | ■ |
| <b>Mental health</b>            |                   |                   |                   |                   |                   |                   |                   |                   |                   |                   |   |
| Poor or fair                    |                   |                   |                   |                   |                   |                   |                   |                   |                   |                   | ■ |
| Good or higher                  | 0.57 (0.22, 1.49) | 0.66 (0.36, 1.21) | 1.26 (0.55, 2.86) | 2.35 (1.29, 4.28) | 0.74 (0.44, 1.24) |                   | 1 (0.60, 1.68)    |                   | 0.74 (0.39, 1.40) |                   | ■ |
| <b>Chronic health condition</b> |                   |                   |                   |                   |                   |                   |                   |                   |                   |                   |   |
| No                              |                   |                   |                   |                   |                   |                   |                   |                   |                   |                   | ■ |
| Yes                             | 2.03 (0.66, 6.23) | 2.93 (1.25, 6.88) | 3.15 (2.30, 4.32) | 2.69 (2.04, 3.53) | 1.52 (0.96, 2.43) | 2.04 (1.27, 3.27) | 0.92 (0.56, 1.52) |                   | 1.94 (0.70, 5.36) | 1.78 (0.53, 5.99) | ■ |

0 1 2 3 4 5 6  
Pooled AOR

**Appendix 2figure 6: Estimated associations between type of health insurance and mental care by countries: Odds ratio (OR) and adjusted odds ratio (aOR)**

| Factors                         | ETHIOPIA          |                   | KENYA             |                   | SOUTH AFRICA      |                   | LAOS              |                   | INDIA             |                   | Pooled AOR |
|---------------------------------|-------------------|-------------------|-------------------|-------------------|-------------------|-------------------|-------------------|-------------------|-------------------|-------------------|------------|
|                                 | OR (95%CI)        | aOR(95%CI)        | OR (95%CI)        | aOR(95%CI)        | OR (95%CI)        | aOR(95%CI)        | OR (95%CI)        | aOR(95%CI)        | OR (95%CI)        | aOR(95%CI)        |            |
| <b>Enabling factors</b>         |                   |                   |                   |                   |                   |                   |                   |                   |                   |                   |            |
| <b>Insurance</b>                |                   |                   |                   |                   |                   |                   |                   |                   |                   |                   |            |
| Private+                        |                   |                   |                   |                   |                   |                   |                   |                   |                   |                   |            |
| Public                          | 0.88 (0.27, 2.89) | 0.92 (0.27, 3.09) | 1.02 (0.42, 2.51) | 0.92 (0.38, 2.26) |                   |                   | 0.47 (0.14, 1.60) | 0.65 (0.17, 2.48) | 2.53 (0.94, 6.81) | 2.8 (0.97, 8.07)  |            |
| Uninsured                       | 1.02 (0.30, 3.48) | 1.11 (0.33, 3.71) | 0.94 (0.37, 2.40) | 0.79 (0.31, 2.06) | 0.67 (0.39, 1.15) | 0.6 (0.32, 1.13)  |                   |                   | 0.88 (0.39, 2.00) | 0.82 (0.31, 2.14) |            |
| <b>Area of residence</b>        |                   |                   |                   |                   |                   |                   |                   |                   |                   |                   |            |
| Rural                           |                   |                   |                   |                   |                   |                   |                   |                   |                   |                   |            |
| Urban                           | 1.26 (0.67, 2.37) |                   | 1.14 (0.53, 2.45) |                   | 1.59 (0.93, 2.71) | 1.35 (0.78, 2.33) | 1.12 (0.32, 4.00) | 0.5 (0.12, 2.13)  | 1.02 (0.57, 1.82) |                   |            |
| <b>Household income</b>         |                   |                   |                   |                   |                   |                   |                   |                   |                   |                   |            |
| Low/Middle                      |                   |                   |                   |                   |                   |                   |                   |                   |                   |                   |            |
| Highest                         | 0.77 (0.42, 1.42) |                   | 1.23 (0.59, 2.58) |                   | 1.06 (0.65, 1.74) |                   | 26.4 (5.13, 136)  | 34.7 (4.99, 241)  | 0.32 (0.11, 0.91) | 0.41 (0.15, 1.11) |            |
| <b>Predisposing factors</b>     |                   |                   |                   |                   |                   |                   |                   |                   |                   |                   |            |
| <b>Age</b>                      |                   |                   |                   |                   |                   |                   |                   |                   |                   |                   |            |
| 18-29                           |                   |                   |                   |                   |                   |                   |                   |                   |                   |                   |            |
| 30-39                           | 2.15 (0.59, 7.87) | 2.13 (0.61, 7.47) | 0.47 (0.17, 1.28) | 0.44 (0.17, 1.15) | 1.15 (0.69, 1.94) | 1.01 (0.58, 1.76) | 1.24 (0.17, 8.78) | 0.94 (0.12, 7.21) | 0.91 (0.48, 1.74) | 0.63 (0.33, 1.22) |            |
| 40-49                           | 2.19 (0.72, 6.68) | 2.13 (0.70, 6.49) | 1.25 (0.40, 3.89) | 1.12 (0.36, 3.44) | 0.77 (0.45, 1.31) | 0.51 (0.28, 0.91) | 7.5 (1.10, 51.0)  | 6.26 (0.72, 54.1) | 1.18 (0.54, 2.59) | 0.83 (0.36, 1.89) |            |
| 50-59                           | 2.51 (0.54, 11.6) | 2.37 (0.57, 9.91) | 0.81 (0.27, 2.47) | 0.68 (0.22, 2.14) | 1.62 (0.82, 3.19) | 0.78 (0.37, 1.66) | 0.89 (0.12, 6.43) | 0.49 (0.05, 4.44) | 0.71 (0.24, 2.07) | 0.68 (0.22, 2.11) |            |
| 60 or older                     | 3.24 (0.38, 27.7) | 2.84 (0.40, 20.1) | 0.13 (0.02, 1.07) | 0.09 (0.01, 0.79) | 2.37 (0.98, 5.74) | 1.03 (0.46, 2.30) | 4.45 (0.50, 39.6) | 2.33 (0.20, 27.5) | 0 (0.00, 0.00)    | 0 (0.00, 0.00)    |            |
| <b>Gender</b>                   |                   |                   |                   |                   |                   |                   |                   |                   |                   |                   |            |
| Male                            |                   |                   |                   |                   |                   |                   |                   |                   |                   |                   |            |
| Female                          | 0.75 (0.44, 1.30) | 0.78 (0.43, 1.39) | 0.52 (0.20, 1.34) | 0.52 (0.20, 1.33) | 2.01 (1.26, 3.21) | 1.59 (1.02, 2.47) | 1.27 (0.31, 5.15) | 1.59 (0.47, 5.44) | 1.58 (0.89, 2.81) | 1.48 (0.82, 2.66) |            |
| <b>Education</b>                |                   |                   |                   |                   |                   |                   |                   |                   |                   |                   |            |
| None/Primary                    |                   |                   |                   |                   |                   |                   |                   |                   |                   |                   |            |
| Secondary                       | 0.91 (0.46, 1.83) |                   | 1.52 (0.67, 3.49) |                   | 0.57 (0.36, 0.91) | 0.66 (0.42, 1.05) | 1.7 (0.19, 15.0)  |                   | 1.4 (0.67, 2.91)  | 1.24 (0.61, 2.52) |            |
| Post-secondary                  | 0.67 (0.38, 1.20) |                   | 1.68 (0.74, 3.82) |                   | 0.87 (0.52, 1.47) | 0.95 (0.54, 1.67) | 3.49 (0.45, 26.8) |                   | 0.8 (0.42, 1.53)  | 0.71 (0.36, 1.40) |            |
| <b>Need factors</b>             |                   |                   |                   |                   |                   |                   |                   |                   |                   |                   |            |
| <b>General health</b>           |                   |                   |                   |                   |                   |                   |                   |                   |                   |                   |            |
| Poor or fair                    |                   |                   |                   |                   |                   |                   |                   |                   |                   |                   |            |
| Good or higher                  | 0.7 (0.35, 1.37)  |                   | 0.65 (0.22, 1.94) | 0.49 (0.18, 1.34) | 0.42 (0.25, 0.71) |                   | 0.42 (0.09, 1.93) |                   | 0.72 (0.41, 1.29) |                   |            |
| <b>Mental health</b>            |                   |                   |                   |                   |                   |                   |                   |                   |                   |                   |            |
| Poor or fair                    |                   |                   |                   |                   |                   |                   |                   |                   |                   |                   |            |
| Good or higher                  | 0.64 (0.25, 1.65) | 0.74 (0.38, 1.45) | 1.03 (0.30, 3.50) |                   | 0.27 (0.15, 0.47) | 0.3 (0.18, 0.50)  | 0.55 (0.08, 3.79) |                   | 0.58 (0.32, 1.03) | 0.62 (0.35, 1.10) |            |
| <b>Chronic health condition</b> |                   |                   |                   |                   |                   |                   |                   |                   |                   |                   |            |
| No                              |                   |                   |                   |                   |                   |                   |                   |                   |                   |                   |            |
| Yes                             | 1.35 (0.59, 3.09) |                   | 1.46 (0.48, 4.41) |                   | 3.09 (1.84, 5.21) | 2.32 (1.45, 3.70) | 3.68 (0.88, 15.4) | 3.89 (0.79, 19.2) | 1.63 (0.76, 3.50) | 1.96 (0.94, 4.09) |            |

**Appendix 2 figure 7: Estimated associations between type of health insurance and cancer screening by countries: Odds ratio (OR) and adjusted odds ratio (aOR)**

| Factors                         | ETHIOPIA          |                   | KENYA             |                   | SOUTH AFRICA      |                   | LAOS              |                   | INDIA             |                   | Pooled AOR |
|---------------------------------|-------------------|-------------------|-------------------|-------------------|-------------------|-------------------|-------------------|-------------------|-------------------|-------------------|------------|
|                                 | OR (95%CI)        | aOR(95%CI)        | OR (95%CI)        | aOR(95%CI)        | OR (95%CI)        | aOR(95%CI)        | OR (95%CI)        | aOR(95%CI)        | OR (95%CI)        | aOR(95%CI)        |            |
| <b>Enabling factors</b>         |                   |                   |                   |                   |                   |                   |                   |                   |                   |                   |            |
| <b>Insurance</b>                |                   |                   |                   |                   |                   |                   |                   |                   |                   |                   |            |
| Private+                        |                   |                   |                   |                   |                   |                   |                   |                   |                   |                   |            |
| Public                          | 1.34 (0.39, 4.61) | 3.08 (0.77, 12.3) | 0.56 (0.19, 1.61) | 0.5 (0.15, 1.62)  |                   |                   | 0.76 (0.41, 1.40) | 0.56 (0.31, 1.01) | 4.49 (0.91, 22.1) | 2 (0.41, 9.73)    |            |
| Uninsured                       | 2.29 (0.67, 7.82) | 4.04 (1.09, 14.9) | 0.27 (0.09, 0.81) | 0.19 (0.05, 0.69) | 1.51 (0.83, 2.76) | 1.17 (0.59, 2.32) |                   |                   | 1.33 (0.34, 5.25) | 0.49 (0.11, 2.19) |            |
| <b>Area of residence</b>        |                   |                   |                   |                   |                   |                   |                   |                   |                   |                   |            |
| Rural                           |                   |                   |                   |                   |                   |                   |                   |                   |                   |                   |            |
| Urban                           | 2.1 (1.09, 4.04)  | 2.45 (1.17, 5.13) | 0.94 (0.49, 1.82) |                   | 1.61 (0.93, 2.79) | 1.53 (0.88, 2.64) | 1.75 (1.01, 3.04) |                   | 0.82 (0.36, 1.87) |                   |            |
| <b>Household income</b>         |                   |                   |                   |                   |                   |                   |                   |                   |                   |                   |            |
| Low/Middle                      |                   |                   |                   |                   |                   |                   |                   |                   |                   |                   |            |
| Highest                         | 1.22 (0.47, 3.13) |                   | 1.17 (0.61, 2.24) |                   | 0.52 (0.31, 0.87) | 0.64 (0.37, 1.12) | 1.11 (0.61, 1.99) |                   | 0.26 (0.09, 0.78) |                   |            |
| <b>Predisposing factors</b>     |                   |                   |                   |                   |                   |                   |                   |                   |                   |                   |            |
| <b>Age</b>                      |                   |                   |                   |                   |                   |                   |                   |                   |                   |                   |            |
| 18-29                           |                   |                   |                   |                   |                   |                   |                   |                   |                   |                   |            |
| 30-39                           | 1.09 (0.37, 3.17) | 0.86 (0.27, 2.76) | 0.94 (0.41, 2.18) | 0.6 (0.26, 1.40)  | 2.51 (1.40, 4.47) | 2.3 (1.26, 4.21)  | 1.45 (0.57, 3.67) | 1.64 (0.62, 4.37) | 1.01 (0.39, 2.62) | 0.72 (0.28, 1.86) |            |
| 40-49                           | 1.33 (0.40, 4.47) | 1.21 (0.36, 4.03) | 1.73 (0.82, 3.66) | 1.21 (0.56, 2.62) | 1.66 (0.83, 3.33) | 1.07 (0.49, 2.34) | 1.69 (0.72, 3.95) | 2.18 (0.88, 5.45) | 0.41 (0.13, 1.27) | 0.23 (0.06, 0.89) |            |
| 50-59                           | 0.36 (0.13, 1.00) | 0.3 (0.09, 0.97)  | 2.44 (0.99, 6.06) | 1.31 (0.44, 3.86) | 2.53 (1.21, 5.30) | 1.58 (0.72, 3.51) | 1.4 (0.56, 3.52)  | 1.74 (0.67, 4.53) | 0 (0.00, 0.00)    | 0 (0.00, 0.00)    |            |
| 60 or older                     | 0.04 (0.00, 0.31) | 0.03 (0.00, 0.30) | 5.82 (0.97, 35.0) | 2.94 (0.56, 15.5) | 2.72 (1.03, 7.21) | 1.48 (0.65, 3.37) | 0.87 (0.31, 2.47) | 1.51 (0.50, 4.57) | 2.88 (0.40, 20.6) | 3.57 (0.50, 25.8) |            |
| <b>Education</b>                |                   |                   |                   |                   |                   |                   |                   |                   |                   |                   |            |
| None/Primary                    |                   |                   |                   |                   |                   |                   |                   |                   |                   |                   |            |
| Secondary                       | 0.96 (0.50, 1.84) | 0.53 (0.28, 1.01) | 0.57 (0.32, 1.00) | 0.55 (0.25, 1.24) | 0.54 (0.33, 0.88) |                   | 1.47 (0.82, 2.63) | 1.81 (0.92, 3.56) | 2.3 (0.79, 6.69)  | 2.71 (0.83, 8.86) |            |
| Post-secondary                  | 1.43 (0.84, 2.44) | 0.59 (0.32, 1.09) | 1.15 (0.64, 2.08) | 0.93 (0.39, 2.22) | 0.49 (0.29, 0.85) |                   | 1.44 (0.79, 2.63) | 1.64 (0.86, 3.12) | 0.6 (0.24, 1.51)  | 0.6 (0.19, 1.87)  |            |
| <b>Need factors</b>             |                   |                   |                   |                   |                   |                   |                   |                   |                   |                   |            |
| <b>General health</b>           |                   |                   |                   |                   |                   |                   |                   |                   |                   |                   |            |
| Poor or fair                    |                   |                   |                   |                   |                   |                   |                   |                   |                   |                   |            |
| Good or higher                  | 1.34 (0.77, 2.35) |                   | 0.26 (0.10, 0.67) | 0.22 (0.09, 0.54) | 0.32 (0.18, 0.55) | 0.47 (0.27, 0.82) | 0.56 (0.29, 1.07) |                   | 0.83 (0.36, 1.92) |                   |            |
| <b>Mental health</b>            |                   |                   |                   |                   |                   |                   |                   |                   |                   |                   |            |
| Poor or fair                    |                   |                   |                   |                   |                   |                   |                   |                   |                   |                   |            |
| Good or higher                  | 3.34 (1.27, 8.81) | 3.08 (1.06, 8.95) | 0.84 (0.21, 3.40) | 3.13 (1.54, 6.37) | 0.46 (0.23, 0.91) | 0.68 (0.34, 1.34) | 0.34 (0.18, 0.65) | 0.29 (0.15, 0.57) | 1.13 (0.47, 2.70) |                   |            |
| <b>Chronic health condition</b> |                   |                   |                   |                   |                   |                   |                   |                   |                   |                   |            |
| No                              |                   |                   |                   |                   |                   |                   |                   |                   |                   |                   |            |
| Yes                             | 1.43 (0.75, 2.75) | 1.89 (1.28, 2.79) | 2.48 (1.26, 4.90) |                   | 2.27 (1.30, 3.94) | 1.49 (0.91, 2.44) | 1.65 (0.87, 3.11) |                   | 1.38 (0.38, 5.03) |                   |            |

**Appendix 2 figure 8: Estimated associations between type of health insurance and cardiovascular examination by countries: Odds ratio (OR) and adjusted odds ratio (aOR)**

| Factors                         | ETHIOPIA          |                   | KENYA             |                   | SOUTH AFRICA      |                   | LAOS              |                   | INDIA             |                   | Pooled AOR |
|---------------------------------|-------------------|-------------------|-------------------|-------------------|-------------------|-------------------|-------------------|-------------------|-------------------|-------------------|------------|
|                                 | OR (95%CI)        | aOR(95%CI)        | OR (95%CI)        | aOR(95%CI)        | OR (95%CI)        | aOR(95%CI)        | OR (95%CI)        | aOR(95%CI)        | OR (95%CI)        | aOR(95%CI)        |            |
| <b>Enabling factors</b>         |                   |                   |                   |                   |                   |                   |                   |                   |                   |                   |            |
| <b>Insurance</b>                |                   |                   |                   |                   |                   |                   |                   |                   |                   |                   |            |
| Private+                        |                   |                   |                   |                   |                   |                   |                   |                   |                   |                   | ■          |
| Public                          | 0.31 (0.11, 0.85) | 0.7 (0.30, 1.65)  | 0.44 (0.21, 0.93) | 0.57 (0.28, 1.15) |                   |                   | 0.67 (0.40, 1.12) | 0.83 (0.49, 1.40) | 1.56 (0.73, 3.35) | 1.78 (0.87, 3.66) | ■          |
| Uninsured                       | 0.45 (0.18, 1.11) | 0.71 (0.32, 1.56) | 0.26 (0.13, 0.53) | 0.3 (0.15, 0.61)  | 0.69 (0.46, 1.04) | 0.8 (0.52, 1.21)  |                   |                   | 0.48 (0.25, 0.92) | 0.54 (0.30, 0.99) | ■          |
| <b>Area of residence</b>        |                   |                   |                   |                   |                   |                   |                   |                   |                   |                   |            |
| Rural                           |                   |                   |                   |                   |                   |                   |                   |                   |                   |                   | ■          |
| Urban                           | 3.13 (1.98, 4.93) | 2.46 (1.74, 3.48) | 1.06 (0.68, 1.67) |                   | 1.52 (1.11, 2.10) | 1.3 (0.93, 1.82)  | 1.16 (0.86, 1.57) |                   | 0.95 (0.68, 1.35) |                   | ■          |
| <b>Household income</b>         |                   |                   |                   |                   |                   |                   |                   |                   |                   |                   |            |
| Low/Middle                      |                   |                   |                   |                   |                   |                   |                   |                   |                   |                   | ■          |
| Highest                         | 1.91 (1.33, 2.75) | 1.68 (1.22, 2.32) | 1.1 (0.82, 1.48)  | 1.23 (0.92, 1.65) | 1.02 (0.76, 1.38) |                   | 1.35 (0.96, 1.89) | 1.23 (0.86, 1.77) | 0.84 (0.45, 1.59) | 0.65 (0.36, 1.16) | ■          |
| <b>Predisposing factors</b>     |                   |                   |                   |                   |                   |                   |                   |                   |                   |                   |            |
| <b>Age</b>                      |                   |                   |                   |                   |                   |                   |                   |                   |                   |                   |            |
| 18-29                           |                   |                   |                   |                   |                   |                   |                   |                   |                   |                   | ■          |
| 30-39                           | 1.79 (1.07, 2.98) | 1.35 (0.84, 2.15) | 1.03 (0.78, 1.36) | 0.76 (0.54, 1.06) | 1.28 (0.91, 1.79) | 1.13 (0.80, 1.59) | 1.63 (1.01, 2.61) | 1.63 (0.99, 2.67) | 1.44 (1.04, 2.00) | 1.13 (0.80, 1.59) | ■          |
| 40-49                           | 2.55 (1.31, 4.96) | 2.28 (1.18, 4.40) | 1.44 (0.84, 2.47) | 1.31 (0.69, 2.50) | 1.8 (1.20, 2.71)  | 1.36 (0.87, 2.13) | 2.26 (1.43, 3.58) | 2.17 (1.32, 3.55) | 1.85 (1.20, 2.85) | 1.39 (0.88, 2.22) | ■          |
| 50-59                           | 2.14 (0.94, 4.90) | 1.66 (0.80, 3.47) | 1.75 (0.93, 3.28) | 1.42 (0.74, 2.72) | 3.22 (1.81, 5.75) | 1.82 (1.01, 3.27) | 1.5 (0.87, 2.57)  | 1.37 (0.78, 2.42) | 3.09 (1.55, 6.18) | 2.59 (1.33, 5.04) | ■          |
| 60 or older                     | 2.26 (0.72, 7.05) | 2.09 (0.67, 6.51) | 2.75 (1.66, 4.57) | 2.05 (0.97, 4.33) | 3.33 (1.59, 6.96) | 1.41 (0.65, 3.10) | 3.1 (1.43, 6.73)  | 2.61 (1.12, 6.08) | 1.91 (0.84, 4.34) | 1.78 (0.82, 3.84) | ■          |
| <b>Gender</b>                   |                   |                   |                   |                   |                   |                   |                   |                   |                   |                   |            |
| Male                            |                   |                   |                   |                   |                   |                   |                   |                   |                   |                   | ■          |
| Female                          | 0.88 (0.58, 1.33) |                   | 2.25 (1.64, 3.08) | 2.64 (1.86, 3.76) | 2.06 (1.53, 2.78) | 1.69 (1.25, 2.29) | 1.5 (1.06, 2.12)  | 1.75 (1.23, 2.50) | 1.12 (0.80, 1.57) | 1.47 (1.05, 2.08) | ■          |
| <b>Education</b>                |                   |                   |                   |                   |                   |                   |                   |                   |                   |                   |            |
| None/Primary                    |                   |                   |                   |                   |                   |                   |                   |                   |                   |                   | ■          |
| Secondary                       | 1.42 (0.80, 2.51) | 1.19 (0.71, 2.01) | 0.74 (0.51, 1.06) | 0.82 (0.50, 1.35) | 0.74 (0.54, 1.00) |                   | 0.85 (0.60, 1.21) | 1.2 (0.81, 1.78)  | 1.08 (0.68, 1.71) |                   | ■          |
| Post-secondary                  | 2.86 (1.87, 4.39) | 1.6 (1.15, 2.23)  | 1.56 (1.11, 2.19) | 1.54 (0.97, 2.44) | 0.75 (0.54, 1.04) |                   | 1.6 (1.13, 2.27)  | 2.01 (1.33, 3.04) | 1.07 (0.70, 1.62) |                   | ■          |
| <b>Need factors</b>             |                   |                   |                   |                   |                   |                   |                   |                   |                   |                   |            |
| <b>General health</b>           |                   |                   |                   |                   |                   |                   |                   |                   |                   |                   |            |
| Poor or fair                    |                   |                   |                   |                   |                   |                   |                   |                   |                   |                   | ■          |
| Good or higher                  | 0.59 (0.37, 0.95) | 0.61 (0.37, 1.01) | 0.58 (0.37, 0.93) |                   | 0.46 (0.32, 0.67) | 0.77 (0.52, 1.16) | 1.1 (0.75, 1.61)  | 1.45 (0.95, 2.21) | 0.57 (0.40, 0.80) | 0.67 (0.48, 0.95) | ■          |
| <b>Mental health</b>            |                   |                   |                   |                   |                   |                   |                   |                   |                   |                   |            |
| Poor or fair                    |                   |                   |                   |                   |                   |                   |                   |                   |                   |                   | ■          |
| Good or higher                  | 0.76 (0.42, 1.38) |                   | 0.72 (0.32, 1.66) |                   | 0.8 (0.53, 1.21)  |                   | 1.19 (0.81, 1.75) |                   | 0.73 (0.51, 1.05) |                   | ■          |
| <b>Chronic health condition</b> |                   |                   |                   |                   |                   |                   |                   |                   |                   |                   |            |
| No                              |                   |                   |                   |                   |                   |                   |                   |                   |                   |                   | ■          |
| Yes                             | 2.76 (1.50, 5.08) | 1.86 (1.01, 3.41) | 4.4 (2.86, 6.78)  | 4.18 (2.67, 6.54) | 6.62 (4.38, 10.0) | 4.71 (2.92, 7.59) | 2.49 (1.61, 3.86) | 2.73 (1.61, 4.62) | 3.83 (2.14, 6.88) | 3.16 (1.82, 5.51) | ■          |

**Appendix 2 figure 9: Estimated associations between type of health insurance and eye or teeth examination by countries: Odds ratio (OR) and adjusted odds ratio (aOR)**

| Factors                         | ETHIOPIA          |                   | KENYA             |                   | SOUTH AFRICA      |                   | LAOS              |                   | INDIA             |                   |   |
|---------------------------------|-------------------|-------------------|-------------------|-------------------|-------------------|-------------------|-------------------|-------------------|-------------------|-------------------|---|
|                                 | OR (95%CI)        | aOR(95%CI)        | OR (95%CI)        | aOR(95%CI)        | OR (95%CI)        | aOR(95%CI)        | OR (95%CI)        | aOR(95%CI)        | OR (95%CI)        | aOR(95%CI)        |   |
| <b>Enabling factors</b>         |                   |                   |                   |                   |                   |                   |                   |                   |                   |                   |   |
| <b>Insurance</b>                |                   |                   |                   |                   |                   |                   |                   |                   |                   |                   |   |
| Private+                        |                   |                   |                   |                   |                   |                   |                   |                   |                   |                   |   |
| Public                          | 0.35 (0.16, 0.75) | 0.41 (0.19, 0.87) | 0.6 (0.32, 1.15)  | 0.57 (0.29, 1.11) |                   |                   | 0.5 (0.33, 0.75)  | 0.65 (0.43, 0.98) | 1.58 (0.71, 3.54) | 2.17 (0.82, 5.74) | ■ |
| Uninsured                       | 0.59 (0.28, 1.25) | 0.66 (0.33, 1.32) | 0.26 (0.14, 0.48) | 0.28 (0.14, 0.55) | 0.34 (0.24, 0.50) | 0.41 (0.27, 0.62) |                   |                   | 0.67 (0.34, 1.31) | 0.84 (0.35, 2.05) | ■ |
| <b>Area of residence</b>        |                   |                   |                   |                   |                   |                   |                   |                   |                   |                   |   |
| Rural                           |                   |                   |                   |                   |                   |                   |                   |                   |                   |                   |   |
| Urban                           | 1.66 (1.11, 2.46) | 1.33 (0.81, 2.17) | 1.73 (0.95, 3.13) | 1.58 (0.99, 2.53) | 1.16 (0.84, 1.62) |                   | 1.99 (1.43, 2.75) | 1.49 (1.07, 2.08) | 1.38 (0.94, 2.03) | 1.54 (1.05, 2.28) | ■ |
| <b>Household income</b>         |                   |                   |                   |                   |                   |                   |                   |                   |                   |                   |   |
| Low/Middle                      |                   |                   |                   |                   |                   |                   |                   |                   |                   |                   |   |
| Highest                         | 1.21 (0.86, 1.71) |                   | 1.29 (0.86, 1.94) |                   | 1.62 (1.20, 2.18) | 1.21 (0.87, 1.69) | 2.19 (1.50, 3.19) | 1.82 (1.23, 2.69) | 1.11 (0.55, 2.22) |                   | ■ |
| <b>Predisposing factors</b>     |                   |                   |                   |                   |                   |                   |                   |                   |                   |                   |   |
| <b>Age</b>                      |                   |                   |                   |                   |                   |                   |                   |                   |                   |                   |   |
| 18-29                           |                   |                   |                   |                   |                   |                   |                   |                   |                   |                   |   |
| 30-39                           | 2.39 (1.15, 4.98) | 2.1 (1.03, 4.28)  | 0.81 (0.53, 1.24) | 0.66 (0.42, 1.06) | 0.82 (0.58, 1.14) | 0.83 (0.59, 1.16) | 1.57 (0.93, 2.67) | 1.45 (0.81, 2.58) | 1.19 (0.81, 1.74) | 0.94 (0.62, 1.42) | ■ |
| 40-49                           | 2.38 (1.20, 4.73) | 2.17 (1.04, 4.49) | 1.02 (0.61, 1.70) | 0.86 (0.53, 1.40) | 0.84 (0.56, 1.25) | 0.84 (0.56, 1.27) | 1.68 (1.04, 2.74) | 1.56 (0.90, 2.70) | 1.61 (1.00, 2.57) | 1.31 (0.80, 2.16) | ■ |
| 50-59                           | 2.15 (0.81, 5.67) | 1.89 (0.70, 5.09) | 1.44 (0.58, 3.61) | 1.21 (0.41, 3.51) | 1.08 (0.67, 1.72) | 1.09 (0.67, 1.76) | 1.85 (1.07, 3.20) | 1.74 (0.92, 3.27) | 2.84 (1.37, 5.87) | 2.28 (1.14, 4.57) | ■ |
| 60 or older                     | 2.84 (0.74, 10.8) | 2.41 (0.68, 8.57) | 1.97 (0.50, 7.77) | 1.61 (0.39, 6.63) | 1.69 (0.93, 3.08) | 1.59 (0.84, 2.98) | 1.79 (0.95, 3.37) | 1.51 (0.71, 3.23) | 1.48 (0.62, 3.57) | 1.3 (0.56, 3.01)  | ■ |
| <b>Gender</b>                   |                   |                   |                   |                   |                   |                   |                   |                   |                   |                   |   |
| Male                            |                   |                   |                   |                   |                   |                   |                   |                   |                   |                   |   |
| Female                          | 0.92 (0.61, 1.38) |                   | 0.77 (0.52, 1.15) | 0.86 (0.58, 1.28) | 0.82 (0.61, 1.10) | 0.78 (0.58, 1.04) | 1.14 (0.80, 1.61) | 1.35 (0.91, 2.01) | 1.16 (0.80, 1.70) | 1.39 (0.95, 2.04) |   |
| <b>Education</b>                |                   |                   |                   |                   |                   |                   |                   |                   |                   |                   |   |
| None/Primary                    |                   |                   |                   |                   |                   |                   |                   |                   |                   |                   |   |
| Secondary                       | 1.22 (0.69, 2.14) |                   | 1.1 (0.72, 1.68)  |                   | 1.13 (0.83, 1.53) |                   | 1.04 (0.71, 1.52) | 1.04 (0.67, 1.63) | 0.89 (0.54, 1.46) | 0.83 (0.50, 1.38) | ■ |
| Post-secondary                  | 1.49 (0.98, 2.27) |                   | 1.67 (1.13, 2.47) |                   | 1.41 (1.02, 1.95) |                   | 2.15 (1.48, 3.12) | 1.6 (0.99, 2.59)  | 0.84 (0.53, 1.33) | 0.73 (0.46, 1.16) | ■ |
| <b>Need factors</b>             |                   |                   |                   |                   |                   |                   |                   |                   |                   |                   |   |
| <b>General health</b>           |                   |                   |                   |                   |                   |                   |                   |                   |                   |                   |   |
| Poor or fair                    |                   |                   |                   |                   |                   |                   |                   |                   |                   |                   |   |
| Good or higher                  | 0.54 (0.33, 0.90) | 0.62 (0.39, 0.98) | 0.8 (0.46, 1.39)  | 0.83 (0.58, 1.19) | 0.99 (0.69, 1.42) |                   | 1.4 (0.95, 2.08)  | 1.53 (0.98, 2.38) | 0.89 (0.60, 1.32) |                   |   |
| <b>Mental health</b>            |                   |                   |                   |                   |                   |                   |                   |                   |                   |                   |   |
| Poor or fair                    |                   |                   |                   |                   |                   |                   |                   |                   |                   |                   |   |
| Good or higher                  | 0.65 (0.36, 1.19) |                   | 1.03 (0.42, 2.50) |                   | 1.19 (0.78, 1.84) |                   | 1.27 (0.84, 1.92) |                   | 0.76 (0.51, 1.14) |                   |   |
| <b>Chronic health condition</b> |                   |                   |                   |                   |                   |                   |                   |                   |                   |                   |   |
| No                              |                   |                   |                   |                   |                   |                   |                   |                   |                   |                   |   |
| Yes                             | 2.05 (1.25, 3.36) | 1.3 (0.67, 2.52)  | 1.49 (0.87, 2.55) | 1.47 (0.77, 2.81) | 1.16 (0.81, 1.67) |                   | 1.27 (0.84, 1.92) | 1.39 (0.83, 2.31) | 2.46 (1.35, 4.47) | 2.38 (1.33, 4.25) | ■ |

0 1 2 3 4 5 6  
Pooled AOR

**Appendix 2 figure 10: Estimated associations between type of health insurance and confidence in ability to receive and afford care by countries: Odds ratio (OR) and adjusted odds ratio (aOR)**

| Factors                         | ETHIOPIA          |                   | KENYA             |                   | SOUTH AFRICA      |                   | LAOS              |                   | INDIA             |                   |   |
|---------------------------------|-------------------|-------------------|-------------------|-------------------|-------------------|-------------------|-------------------|-------------------|-------------------|-------------------|---|
|                                 | OR (95%CI)        | aOR(95%CI)        | OR (95%CI)        | aOR(95%CI)        | OR (95%CI)        | aOR(95%CI)        | OR (95%CI)        | aOR(95%CI)        | OR (95%CI)        | aOR(95%CI)        |   |
| <b>Enabling factors</b>         |                   |                   |                   |                   |                   |                   |                   |                   |                   |                   |   |
| <b>Insurance</b>                |                   |                   |                   |                   |                   |                   |                   |                   |                   |                   |   |
| Private+                        |                   |                   |                   |                   |                   |                   |                   |                   |                   |                   |   |
| Public                          | 1.67 (0.72, 3.87) | 1.49 (0.70, 3.17) | 0.77 (0.44, 1.37) | 0.82 (0.45, 1.49) |                   |                   | 0.43 (0.22, 0.83) | 0.5 (0.26, 0.96)  | 1.85 (0.79, 4.36) | 1.86 (0.84, 4.15) | ■ |
| Uninsured                       | 1.77 (0.87, 3.64) | 1.66 (0.81, 3.40) | 0.59 (0.34, 1.04) | 0.66 (0.36, 1.22) | 0.63 (0.44, 0.90) | 0.52 (0.35, 0.77) |                   |                   | 1.44 (0.70, 2.92) | 1.39 (0.72, 2.66) | ■ |
| <b>Area of residence</b>        |                   |                   |                   |                   |                   |                   |                   |                   |                   |                   |   |
| Rural                           |                   |                   |                   |                   |                   |                   |                   |                   |                   |                   |   |
| Urban                           | 0.87 (0.55, 1.38) | 0.84 (0.58, 1.24) | 1.17 (0.84, 1.62) |                   | 0.84 (0.62, 1.15) | 0.85 (0.62, 1.16) | 0.86 (0.62, 1.19) | 0.6 (0.41, 0.87)  | 1.02 (0.72, 1.45) |                   | ■ |
| <b>Household income</b>         |                   |                   |                   |                   |                   |                   |                   |                   |                   |                   |   |
| Low/Middle                      |                   |                   |                   |                   |                   |                   |                   |                   |                   |                   |   |
| Highest                         | 1.19 (0.57, 2.46) | 1.26 (0.61, 2.62) | 1.39 (0.93, 2.07) | 1.28 (0.91, 1.80) | 0.99 (0.74, 1.33) |                   | 1.81 (1.27, 2.57) | 1.73 (1.20, 2.49) | 1.65 (0.94, 2.90) | 1.76 (0.95, 3.26) | ■ |
| <b>Predisposing factors</b>     |                   |                   |                   |                   |                   |                   |                   |                   |                   |                   |   |
| <b>Age</b>                      |                   |                   |                   |                   |                   |                   |                   |                   |                   |                   |   |
| 18-29                           |                   |                   |                   |                   |                   |                   |                   |                   |                   |                   |   |
| 30-39                           | 0.93 (0.52, 1.66) | 0.93 (0.54, 1.62) | 0.92 (0.64, 1.31) | 0.89 (0.63, 1.26) | 1.02 (0.74, 1.41) | 1 (0.72, 1.38)    | 2.19 (1.36, 3.55) | 2.13 (1.25, 3.64) | 0.9 (0.64, 1.26)  | 0.92 (0.64, 1.32) | ■ |
| 40-49                           | 1.04 (0.55, 1.97) | 1.1 (0.56, 2.18)  | 1.24 (0.75, 2.03) | 1.28 (0.82, 2.01) | 1.04 (0.70, 1.56) | 1.04 (0.69, 1.57) | 2.67 (1.65, 4.34) | 2.9 (1.67, 5.02)  | 0.75 (0.48, 1.18) | 0.82 (0.51, 1.29) | ■ |
| 50-59                           | 1.54 (0.67, 3.54) | 1.59 (0.64, 3.97) | 1.12 (0.64, 1.95) | 1.21 (0.73, 2.01) | 0.83 (0.52, 1.31) | 0.86 (0.53, 1.39) | 2.14 (1.20, 3.83) | 2.16 (1.14, 4.09) | 0.9 (0.42, 1.93)  | 0.95 (0.48, 1.85) | ■ |
| 60 or older                     | 0.81 (0.27, 2.47) | 0.79 (0.27, 2.25) | 0.87 (0.45, 1.66) | 0.98 (0.56, 1.70) | 1.1 (0.60, 1.99)  | 1.18 (0.62, 2.25) | 4.9 (2.32, 10.3)  | 5.23 (2.17, 12.6) | 1.1 (0.47, 2.59)  | 1.1 (0.50, 2.44)  | ■ |
| <b>Gender</b>                   |                   |                   |                   |                   |                   |                   |                   |                   |                   |                   |   |
| Male                            |                   |                   |                   |                   |                   |                   |                   |                   |                   |                   |   |
| Female                          | 0.98 (0.52, 1.83) |                   | 1.01 (0.64, 1.59) | 1.14 (0.77, 1.69) | 0.81 (0.61, 1.08) | 0.85 (0.64, 1.13) | 0.99 (0.69, 1.43) | 1.19 (0.82, 1.71) | 1.13 (0.80, 1.59) |                   |   |
| <b>Education</b>                |                   |                   |                   |                   |                   |                   |                   |                   |                   |                   |   |
| None/Primary                    |                   |                   |                   |                   |                   |                   |                   |                   |                   |                   |   |
| Secondary                       | 1.16 (0.72, 1.88) |                   | 1.28 (0.92, 1.78) |                   | 0.75 (0.56, 1.01) | 0.65 (0.48, 0.88) | 0.97 (0.67, 1.41) | 1.42 (0.90, 2.23) | 1.29 (0.80, 2.08) | 1.4 (0.89, 2.20)  | ■ |
| Post-secondary                  | 0.92 (0.63, 1.34) |                   | 1.24 (0.86, 1.80) |                   | 0.8 (0.58, 1.10)  | 0.62 (0.45, 0.87) | 1.13 (0.78, 1.65) | 1.38 (0.88, 2.18) | 1.12 (0.73, 1.72) | 1.12 (0.75, 1.66) | ■ |
| <b>Need factors</b>             |                   |                   |                   |                   |                   |                   |                   |                   |                   |                   |   |
| <b>General health</b>           |                   |                   |                   |                   |                   |                   |                   |                   |                   |                   |   |
| Poor or fair                    |                   |                   |                   |                   |                   |                   |                   |                   |                   |                   |   |
| Good or higher                  | 0.77 (0.47, 1.27) | 0.79 (0.50, 1.24) | 1.39 (1.00, 1.93) |                   | 1.01 (0.71, 1.43) |                   | 1.86 (1.26, 2.74) | 1.66 (1.01, 2.72) | 1.43 (1.00, 2.05) | 1.57 (1.05, 2.35) |   |
| <b>Mental health</b>            |                   |                   |                   |                   |                   |                   |                   |                   |                   |                   |   |
| Poor or fair                    |                   |                   |                   |                   |                   |                   |                   |                   |                   |                   |   |
| Good or higher                  | 0.74 (0.39, 1.42) | 0.78 (0.41, 1.46) | 1.83 (0.88, 3.82) | 1.86 (0.93, 3.72) | 1.23 (0.81, 1.88) | 1.21 (0.79, 1.85) | 1.92 (1.29, 2.86) | 1.39 (0.85, 2.27) | 0.98 (0.67, 1.43) | 0.73 (0.48, 1.10) |   |
| <b>Chronic health condition</b> |                   |                   |                   |                   |                   |                   |                   |                   |                   |                   |   |
| No                              |                   |                   |                   |                   |                   |                   |                   |                   |                   |                   |   |
| Yes                             | 0.85 (0.47, 1.52) | 0.74 (0.45, 1.21) | 0.73 (0.40, 1.34) | 0.78 (0.44, 1.36) | 0.73 (0.51, 1.05) | 0.71 (0.49, 1.03) | 1.19 (0.78, 1.80) | 1.25 (0.77, 2.03) | 0.69 (0.38, 1.27) | 0.75 (0.41, 1.38) | ■ |

0 1 2 3 4 5 6  
Pooled AOR
